# Supplementary material for: Brucella abortus S19 GFP-tagged vaccine allows the serological identification of vaccinated cattle
Source: PubMed Central journal article supplement (PMC8608319; doi:10.1371/journal.pone.0260288), 2021-11-22
Supplement: pone.0260288.s002.pdf [file pone.0260288.s002.pdf]

1 **Supplementary Table S1. Serological results of heifers immunized with S19-GFP**  
 2

| Vaccination protocol                                                        | Heifer    | Assay     | Weeks after vaccination |   |   |   |   |   |    |    |    |    |    |    |    |    |    |    |    |     |
|-----------------------------------------------------------------------------|-----------|-----------|-------------------------|---|---|---|---|---|----|----|----|----|----|----|----|----|----|----|----|-----|
|                                                                             |           |           | 0                       | 2 | 4 | 6 | 7 | 8 | 10 | 12 | 16 | 20 | 24 | 28 | 32 | 38 | 42 | 50 | 64 | 130 |
| <b>Group A</b><br>Subcutaneous<br>S19-GFP                                   | 1227      | RBT       | -                       | + | + | + | + | + | +  | +  | -  | -  | -  | -  | -  | -  | -  | -  | -  |     |
|                                                                             |           | ELISA-GFP | -                       | - | - | - | + | - | +  | +  | +  | +  | +  | +  | -  | -  | -  | -  | -  | -   |
|                                                                             | 73LM      | RBT       | -                       | + | + | + | + | + | +  | -  | -  | -  | -  | -  | -  | -  | -  | -  | -  | ND  |
|                                                                             |           | ELISA-GFP | -                       | - | - | - | - | - | +  | +  | +  | +  | -* | -  | -  | -  | -  | -  | -  | ND  |
|                                                                             | 95A       | RBT       | -                       | + | + | + | + | + | +  | +  | +  | +  | +  | +  | +  | +  | +  | +  | +  | -   |
|                                                                             |           | ELISA-GFP | -                       | - | - | - | - | - | -  | +  | +  | +  | +  | +  | +  | +  | +  | +  | +  | +   |
|                                                                             | 424       | RBT       | -                       | + | + | + | + | + | +  | +  | +  | +  | +  | +  | +  | +  | -  | -  | -  | -   |
|                                                                             |           | ELISA-GFP | -                       | - | - | - | - | + | +  | +  | +  | +  | +  | +  | +  | +  | +  | +  | +  | -   |
|                                                                             | 429       | RBT       | -                       | + | + | + | + | + | +  | +  | -  | -  | -  | -  | -  | -  | -  | -  | -  | -   |
|                                                                             |           | ELISA-GFP | -                       | + | + | + | + | + | +  | +  | +  | +  | +  | +  | +  | +  | -  | -  | -  | -   |
| <b>Group B</b><br>Subcutaneous<br>S19-GFP/GFP<br>7 weeks after<br>GFP boost | 1217      | RBT       | -                       | + | + | + | + | + | +  | -  | -  | -  | -  | -  | -  | -  | -  | -  | -  |     |
|                                                                             |           | ELISA-GFP | -                       | + | + | + | + | + | +  | +  | +  | +  | +  | +  | +  | -  | -  | -  | -  | +   |
|                                                                             | 1218      | RBT       | -                       | + | + | + | + | + | +  | +  | -  | -  | -  | -  | -  | -  | -  | -  | -  | -   |
|                                                                             |           | ELISA-GFP | -                       | + | + | + | + | + | +  | +  | +  | +  | +  | +  | +  | +  | +  | -  | -  | +   |
|                                                                             | 1221      | RBT       | -                       | + | + | + | + | + | +  | +  | +  | +  | -  | -  | -  | -  | -  | -  | -  | -   |
|                                                                             |           | ELISA-GFP | -                       | + | + | - | + | + | +  | +  | +  | +  | +  | +  | +  | +  | +  | -  | -  | -   |
|                                                                             | 1223      | RBT       | -                       | + | + | + | + | + | +  | +  | +  | +  | -  | -  | -  | -  | -  | -  | -  | -   |
|                                                                             |           | ELISA-GFP | -                       | - | - | - | - | + | +  | -  | +  | -  | -* | -  | -  | -  | -  | -  | -  | -   |
|                                                                             | 70LM      | RBT       | -                       | + | + | + | + | + | +  | +  | +  | +  | +  | +  | +  | +  | +  | +  | -  | -   |
|                                                                             |           | ELISA-GFP | -                       | + | + | + | + | + | +  | +  | +  | +  | +  | +  | +  | +  | +  | +  | +  | -   |
|                                                                             | 72LM      | RBT       | -                       | + | + | + | + | + | +  | +  | -  | -  | -  | -  | -  | -  | -  | -  | -  | -   |
|                                                                             |           | ELISA-GFP | -                       | + | + | + | + | + | +  | +  | +  | +  | +  | +  | +  | +  | +  | -  | -  | +   |
|                                                                             | 70A       | RBT       | -                       | + | + | + | + | - | -  | -  | -  | -  | -  | -  | -  | -  | -  | -  | -  | -   |
|                                                                             |           | ELISA-GFP | -                       | + | - | + | + | + | +  | +  | +  | +  | +  | +  | +  | +  | -  | -  | -  | -   |
| 428                                                                         | RBT       | -         | +                       | + | + | + | - | - | -  | -  | -  | -  | -  | -  | -  | -  | -  | -  | -  |     |
|                                                                             | ELISA-GFP | -         | +                       | + | + | + | + | + | +  | +  | +  | +  | +  | +  | +  | -  | -  | -  | +  |     |

|                                                                         |           |           |   |   |   |   |   |   |   |   |   |    |   |   |   |   |   |   |   |   |
|-------------------------------------------------------------------------|-----------|-----------|---|---|---|---|---|---|---|---|---|----|---|---|---|---|---|---|---|---|
|                                                                         | 431       | RBT       | - | + | + | + | + | + | + | + | - | -  | - | - | - | - | - | - | - |   |
|                                                                         |           | ELISA-GFP | - | + | + | + | + | + | + | + | + | +  | + | + | + | + | + | - | - | - |
|                                                                         | 435       | RBT       | - | + | + | + | + | + | + | + | - | -  | - | - | - | - | - | - | - | - |
|                                                                         |           | ELISA-GFP | - | + | + | - | + | + | + | + | + | +  | + | + | + | + | - | - | - | + |
| <b>Group C</b><br>Subcutaneous<br>S19-GFP<br>7 weeks after<br>GFP boost | 1219      | RBT       | - | + | + | + | + | + | + | - | - | -  | - | - | - | - | - | - | - |   |
|                                                                         |           | ELISA-GFP | - | - | - | - | + | + | + | + | + | +  | + | + | - | - | - | - | - | - |
|                                                                         | 1222      | RBT       | - | + | + | + | + | + | + | + | - | -  | - | - | - | - | - | - | - | - |
|                                                                         |           | ELISA-GFP | - | - | - | + | - | + | + | + | + | +  | + | + | + | + | + | - | - | - |
|                                                                         | 1230      | RBT       | - | + | + | + | + | + | + | + | + | +  | + | + | + | + | - | - | - | - |
|                                                                         |           | ELISA-GFP | - | + | - | + | + | + | + | + | + | +  | + | + | + | + | + | - | - | - |
|                                                                         | 76A       | RBT       | - | + | + | + | + | + | + | + | - | -  | - | - | - | - | - | - | - | - |
|                                                                         |           | ELISA-GFP | - | - | - | - | - | + | + | + | + | +  | + | + | - | - | - | - | - | - |
| 436                                                                     | RBT       | -         | + | + | + | + | + | + | + | + | + | -  | - | - | - | - | - | - | - |   |
|                                                                         | ELISA-GFP | -         | - | - | - | - | + | + | + | + | + | -* | - | - | - | - | - | - | + |   |
| <b>Group D</b><br>Conjunctival<br>S19-GFP<br>7 weeks after<br>GFP boost | 425       | RBT       | - | + | + | - | - | - | - | - | - | -  | - | - | - | - | - | - | - |   |
|                                                                         |           | ELISA-GFP | - | + | + | + | + | + | + | + | + | +  | + | + | + | + | + | - | - | + |
|                                                                         | 426       | RBT       | - | + | + | - | - | - | - | - | - | -  | - | - | - | - | - | - | - | - |
|                                                                         |           | ELISA-GFP | - | - | - | - | - | + | + | + | + | +  | + | + | + | + | - | - | - | - |
|                                                                         | 432       | RBT       | - | + | + | - | - | - | - | - | - | -  | - | - | - | - | - | - | - | - |
|                                                                         |           | ELISA-GFP | - | + | - | + | + | + | + | + | + | +  | + | + | + | + | + | - | - | - |
|                                                                         | 433       | RBT       | - | + | + | - | - | - | - | - | - | -  | - | - | - | - | - | - | - | - |
|                                                                         |           | ELISA-GFP | - | - | - | + | + | + | + | + | + | +  | + | + | + | + | + | - | - | - |
| 434                                                                     | RBT       | -         | + | + | + | + | - | - | - | - | - | -  | - | - | - | - | - | - | - |   |
|                                                                         | ELISA-GFP | -         | - | - | + | + | + | + | + | + | + | -* | - | - | - | - | - | - | - |   |

3

4 Results are RBT and iELISA-GFP, exception for week 130, which were tested also by WB for GFP. (-) Negative reaction; (+)  
5 Positive reaction. (\*) Indicates positive reaction in WB for GFP, (ND) not determined.

6

7

8
