# Supplementary material for: Brucella abortus S19 GFP-tagged vaccine allows the serological identification of vaccinated cattle
Source: PubMed Central journal article supplement (PMC8608319; doi:10.1371/journal.pone.0260288), 2021-11-22
Supplement: pone.0260288.s003.pdf [file pone.0260288.s003.pdf]

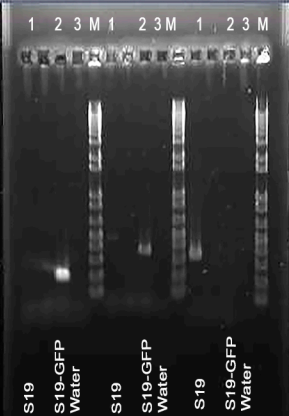

Figure 1B.  
UVP Photo Doc-It Imaging System

M: Lane with DNA ladder

M S19 S19-GFP Neg. control X

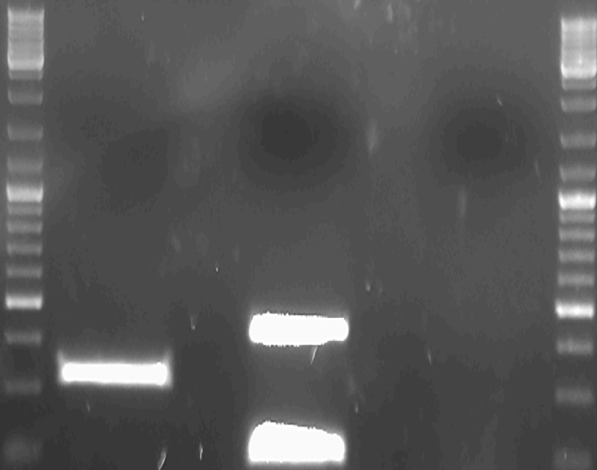

Figure 1D. UVP Photo Doc-IT imaging System  
M: Lane with DNA ladder

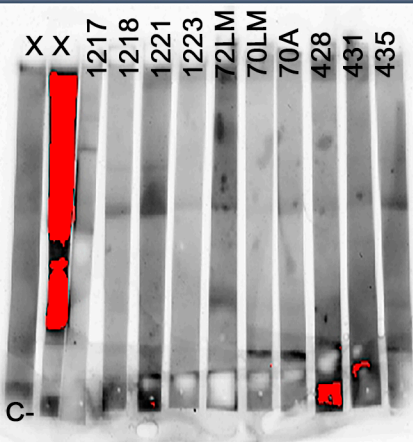

Supplemental Figure 1. Subgroup B  
ChemiDoc Imaging Systems

Membrane contains purified GFP  
Each strip sera from different cows

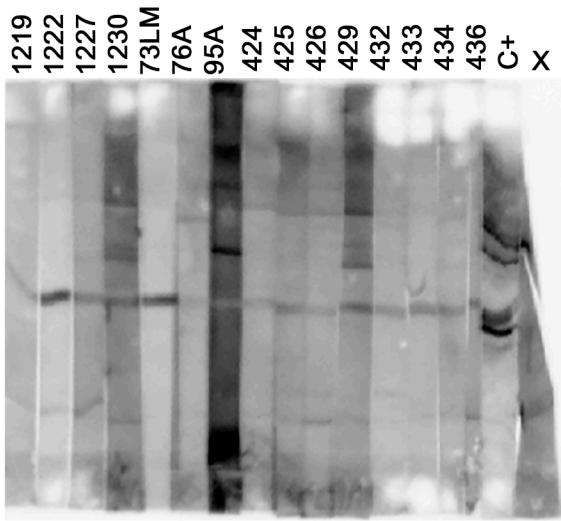

Supplemental Figure 1. Subgroup A,C,D  
 ChemiDoc Imaging Systems  
 Membrane contains purified GFP  
 Each strip sera from different cows
